# Supplementary material for: Active chiral dynamics and boundary accumulation phenomenon in confined camphor particles
Source: Royal Society of Chemistry journal article supplement (doi:10.1039/d3sm01407j), 2023-12-27
Supplement: d3sm01407j1.pdf [file d3sm01407j1.pdf]

## “Supporting Information”

# Confined camphor particles: Active chiral dynamics and boundary accumulation phenomenon.

José-Manuel Cruz, Orlando Díaz-Hernández, Andrés Castañeda-Jonapa, Gustavo Morales-Padrón, Alberto Estudillo, Raúl Salgado-García.

The Electronic Supplementary Information section contains additional videos that are referenced in the main text.

**Video 1. Type1\_Trajectory. Camphor discs reach the Petri dish wall before 2 seconds after released.**

**Video 2. Type2\_Trajectory. Shows the type 2 trajectory. Camphor discs reach the wall within 2 seconds and 60 seconds after released.**

**Video 3. Type3\_Trajectory. Shows the type 3 trajectory. Camphor discs reach the wall in 60 seconds or more after released.**

**Video 4. Type4\_Trajectory. Shows the type 4 trajectory. Camphor discs does not reach the wall during the experiment (5 minutes).**

**Video 5. Experiment. Shows an experiment.**

**Table 1. Shows the time span for estimating mean angular velocity and mean linear speed.**

**Table S1**

| Time span for estimating mean angular velocity and mean linear speed.<br>(No estimation is achieved if the experimental time span is lower than 50 s) |               |                  |               |
|-------------------------------------------------------------------------------------------------------------------------------------------------------|---------------|------------------|---------------|
| Experimental run                                                                                                                                      | Time span (s) | Experimental run | Time span (s) |
| 1                                                                                                                                                     | -             | 51               | -             |
| 2                                                                                                                                                     | -             | 52               | -             |
| 3                                                                                                                                                     | -             | 53               | -             |
| 4                                                                                                                                                     | -             | 54               | -             |
| 5                                                                                                                                                     | -             | 55               | -             |
| 6                                                                                                                                                     | -             | 56               | -             |
| 7                                                                                                                                                     | 76.65         | 57               | -             |
| 8                                                                                                                                                     | -             | 58               | -             |
| 9                                                                                                                                                     | -             | 59               | 145.66        |
| 10                                                                                                                                                    | -             | 60               | -             |
| 11                                                                                                                                                    | -             | 61               | -             |
| 12                                                                                                                                                    | -             | 62               | -             |
| 13                                                                                                                                                    | 94.00         | 63               | -             |
| 14                                                                                                                                                    | -             | 64               | -             |
| 15                                                                                                                                                    | -             | 65               | -             |
| 16                                                                                                                                                    | 59.73         | 66               | -             |
| 17                                                                                                                                                    | -             | 67               | -             |
| 18                                                                                                                                                    | -             | 68               | -             |
| 19                                                                                                                                                    | 52.00         | 69               | -             |
| 20                                                                                                                                                    | -             | 70               | -             |
| 21                                                                                                                                                    | -             | 71               | -             |
| 22                                                                                                                                                    | -             | 72               | 55.33         |
| 23                                                                                                                                                    | 52.33         | 73               | -             |
| 24                                                                                                                                                    | -             | 74               | -             |
| 25                                                                                                                                                    | -             | 75               | 60.00         |
| 26                                                                                                                                                    | -             | 76               | -             |
| 27                                                                                                                                                    | 93.25         | 77               | -             |
| 28                                                                                                                                                    | 141.66        | 78               | -             |
| 29                                                                                                                                                    | -             | 79               | 57.16         |
| 30                                                                                                                                                    | 76.83         | 80               | -             |
| 31                                                                                                                                                    | -             | 81               | 102.50        |
| 32                                                                                                                                                    | 140.33        | 82               | -             |
| 33                                                                                                                                                    | -             | 83               | -             |
| 34                                                                                                                                                    | -             | 84               | -             |
| 35                                                                                                                                                    | -             | 85               | -             |
| 36                                                                                                                                                    | -             |                  |               |
| 37                                                                                                                                                    | -             |                  |               |
| 38                                                                                                                                                    | -             |                  |               |
| 39                                                                                                                                                    | 189.70        |                  |               |
| 40                                                                                                                                                    | 150.83        |                  |               |
| 41                                                                                                                                                    | -             |                  |               |
| 42                                                                                                                                                    | -             |                  |               |
| 43                                                                                                                                                    | -             |                  |               |
| 44                                                                                                                                                    | -             |                  |               |
| 45                                                                                                                                                    | -             |                  |               |
| 46                                                                                                                                                    | -             |                  |               |
| 47                                                                                                                                                    | -             |                  |               |
| 48                                                                                                                                                    | -             |                  |               |
| 49                                                                                                                                                    | 123.16        |                  |               |
| 50                                                                                                                                                    | 72.66         |                  |               |

Table 2. Shows the time span for estimating sliding dynamics.

Table S2

| Time spans for estimating sliding dynamics |               |                                              |               |
|--------------------------------------------|---------------|----------------------------------------------|---------------|
| Experimental run                           | Time span (s) | Experimental run                             | Time span (s) |
| 1                                          | 72.67         | 50                                           | 236.33        |
| 2                                          | 298.55        | 51                                           | 282.05        |
| 3                                          | 259.62        | 52                                           | 296.67        |
| 4                                          | 290.33        | 53                                           | 7.75          |
| 5                                          | 309.08        | 54                                           | 309.58        |
| 6                                          | 67.83         | 55                                           | 325.08        |
| 7                                          | 0.00          | 56                                           | 289.25        |
| 8                                          | 282.37        | 57                                           | 301.58        |
| 9                                          | 287.20        | 58                                           | 1.42          |
| 10                                         | 301.02        | 59                                           | 13.52         |
| 11                                         | 299.17        | 60                                           | 0.00          |
| 12                                         | 256.00        | 61                                           | 79.67         |
| 13                                         | 175.33        | 62                                           | 309.87        |
| 14                                         | 281.40        | 63                                           | 38.80         |
| 15                                         | 269.58        | 64                                           | 0.00          |
| 16                                         | 0.00          | 65                                           | 313.50        |
| 17                                         | 14.33         | 66                                           | 290.70        |
| 18                                         | 284.13        | 67                                           | 356.17        |
| 19                                         | 11.63         | 68                                           | 243.17        |
| 20                                         | 300.63        | 69                                           | 366.83        |
| 21                                         | 117.17        | 70                                           | 38.08         |
| 22                                         | 308.33        | 71                                           | 325.00        |
| 23                                         | 284.28        | 72                                           | 20.30         |
| 24                                         | 279.05        | 73                                           | 269.17        |
| 25                                         | 313.80        | 74                                           | 47.45         |
| 26                                         | 309.25        | 75                                           | 165.00        |
| 27                                         | 201.10        | 76                                           | 237.62        |
| 28                                         | 0.00          | 77                                           | 259.70        |
| 29                                         | 275.58        | 78                                           | 302.92        |
| 30                                         | 196.78        | 79                                           | 255.83        |
| 31                                         | 39.58         | 80                                           | 225.80        |
| 32                                         | 222.75        | 81                                           | 206.17        |
| 33                                         | 248.55        | 82                                           | 266.67        |
| 34                                         | 169.50        | 83                                           | 185.17        |
| 35                                         | 250.08        | 84                                           | 271.08        |
| 36                                         | 309.90        | 85                                           | 45.75         |
| 37                                         | 290.67        |                                              |               |
| 38                                         | 268.25        | <b>Mean time span for sliding motion (s)</b> |               |
| 39                                         | 79.53         | 208.03                                       |               |
| 40                                         | 151.50        |                                              |               |
| 41                                         | 109.40        |                                              |               |
| 42                                         | 245.33        |                                              |               |
| 43                                         | 266.03        |                                              |               |
| 44                                         | 277.37        |                                              |               |
| 45                                         | 223.97        |                                              |               |
| 46                                         | 202.42        |                                              |               |
| 47                                         | 305.33        |                                              |               |
| 48                                         | 307.10        |                                              |               |
| 49                                         | 185.25        |                                              |               |
